# Supplementary material for: Human-based New Approach Methodologies in Developmental Toxicity Testing: A Step Ahead from the State-of-the-art with a Feto-placental Organ-on-a-chip Platform
Source: Preprints.org preprint supplement (doi:10.20944/preprints202211.0206.v1), 2022-11-11
Supplement: Supplementary file 1 [file supplementary]

**Table S1** - List of the AOPs present in the AOP-Wiki portal related to developmental toxicity and OECD TG 414, and grouped by affected system

| System | Id  | Title                                                                                                                                                                                                            | AO                                                   | Life stage applicability                    | Taxonomy applicability               | Sex applicability | Author                   | Status                                                |
|--------|-----|------------------------------------------------------------------------------------------------------------------------------------------------------------------------------------------------------------------|------------------------------------------------------|---------------------------------------------|--------------------------------------|-------------------|--------------------------|-------------------------------------------------------|
| CNS    | 12  | Chronic binding of antagonist to N-methyl-D-aspartate receptors (NMDARs) during brain development leads to neurodegeneration with impairment in learning and memory in aging                                     | Neurodegeneration;<br>Learning and memory impairment | During brain development                    | Human, mouse, rat, monkey, zebrafish | NA                | Florianne Tschudi-Monnet | Open for citation & comment                           |
|        | 13  | Chronic binding of antagonist to N-methyl-D-aspartate receptors (NMDARs) during brain development induces impairment of learning and memory abilities                                                            | Learning and memory impairment                       | During brain development                    | Human, mouse, rat, monkey            | Female, male      | Anna Price               | Open for citation & comment                           |
|        | 17  | Binding of electrophilic chemicals to SH(thiol)-group of proteins and /or to seleno-proteins involved in protection against oxidative stress during brain development leads to impairment of learning and memory | Learning and memory impairment                       | During brain development                    | Human, mouse, rat                    | Female, male      | Marie-Gabrielle Zurich   | Under development: Not open for comment. Do not cite  |
|        | 42  | Inhibition of Thyroperoxidase and Subsequent Adverse Neurodevelopmental Outcomes in Mammals                                                                                                                      | Decreased cognitive function                         | During brain development                    | Human, mouse, rat                    | Female, male      | Kevin Crofton            | Open for citation & comment                           |
|        | 54  | Inhibition of Na <sup>+</sup> /I <sup>-</sup> symporter (NIS) leads to learning and memory impairment                                                                                                            | Learning and memory impairment                       | During brain development ; fetal; perinatal | Human, rat                           | Female, male      | Anna Price               | Open for citation & comment                           |
|        | 134 | Sodium Iodide Symporter (NIS) Inhibition and Subsequent Adverse Neurodevelopmental Outcomes in Mammals                                                                                                           | Decreased cognitive function                         | Perinatal                                   | Human, rat                           | Female, male      | Mary Gilbert             | Under Development: Contributions and Comments Welcome |
|        | 152 | Interference with thyroid serum binding protein transthyretin and subsequent adverse human neurodevelopmental toxicity                                                                                           | Decreased cognitive function                         | Development                                 | Rat                                  | Mixed             | Kristie Sullivan         | Under Development: Contributions and Comments Welcome |
|        | 300 | Thyroid Receptor Antagonism and Subsequent Adverse Neurodevelopmental Outcomes in Mammals                                                                                                                        | Decreased cognitive function                         | During brain development                    | Human, mouse                         | Female, male      | Kevin Crofton            | Under development: Not open for comment. Do not cite  |

|                            |     |                                                                                                                                              |                                                      |                                      |                   |              |                  |                                                       |
|----------------------------|-----|----------------------------------------------------------------------------------------------------------------------------------------------|------------------------------------------------------|--------------------------------------|-------------------|--------------|------------------|-------------------------------------------------------|
|                            | 405 | Organo-Phosphate Chemicals induced inhibition of AChE leading to impaired cognitive function                                                 | Decreased cognitive function                         | All life stages                      | Human, mouse, rat | Female, male | Saroj Amar       | Under development: Not open for comment. Do not cite  |
| <b>Reproductive (male)</b> | 18  | PPAR $\alpha$ activation in utero leading to impaired fertility in males                                                                     | Impaired fertility; malformation                     | Development                          | Human, mouse, rat | Male         | Elise Grignard   | Open for citation & comment                           |
|                            | 66  | Modulation of Adult Leydig Cell Function Subsequent Glucocorticoid Activation in the Fetal Testis                                            | Impaired fertility; decreased sperm quantity/quality | Fetal; Adult (reproductively mature) | Rat               | Male         | Gary Klinefelter | Under Development: Contributions and Comments Welcome |
|                            | 67  | Modulation of Adult Leydig Cell Function Subsequent to Estradiol Activation in the Fetal Testis                                              | Impaired fertility; decreased sperm quantity/quality | Fetal; Adult (reproductively mature) | Rat               | Male         | Gary Klinefelter | Under Development: Contributions and Comments Welcome |
|                            | 68  | Modulation of Adult Leydig Cell Function Subsequent to Alterations in the Fetal Testis Protome                                               | Impaired fertility; decreased sperm quantity/quality | Fetal; Adult (reproductively mature) | Rat               | Male         | Gary Klinefelter | Under Development: Contributions and Comments Welcome |
|                            | 74  | Modulation of Adult Leydig Cell Function Subsequent to Hypermethylation in the Fetal Testis                                                  | Impaired fertility; decreased sperm quantity/quality | Fetal; Adult (reproductively mature) | Rat               | Male         | Gary Klinefelter | Under Development: Contributions and Comments Welcome |
|                            | 124 | HMG-CoA reductase inhibition leading to decreased fertility                                                                                  | Impaired fertility                                   | Fetal                                | Rat               | Male         | Kellie Fay       | Under Development: Contributions and Comments Welcome |
|                            | 288 | Inhibition of 17 $\alpha$ -hydrolase/C 10,20-lyase (Cyp17A1) activity leads to birth reproductive defects (cryptorchidism) in male (mammals) | Cryptorchidism                                       | Development                          | Human, rat        | Male         | Bérénice Collet  | Open for citation & comment                           |
|                            | 305 | 5 $\alpha$ -reductase inhibition leading to short anogenital distance (AGD) in male (mammalian) offspring                                    | Decreased AGD                                        | Pregnancy                            | Human, mouse, rat | Male         | Terje Svingen    | Under development: Not open for comment. Do not cite  |
|                            | 306 | Androgen receptor (AR) antagonism leading to short anogenital distance (AGD) in male (mammalian) offspring                                   | Decreased AGD                                        | Pregnancy                            | Human, mouse, rat | Male         | Terje Svingen    | Under development: Not open for comment. Do not cite  |

|                              |     |                                                                                                                    |                                     |                                     |                                |              |                          |                                                       |
|------------------------------|-----|--------------------------------------------------------------------------------------------------------------------|-------------------------------------|-------------------------------------|--------------------------------|--------------|--------------------------|-------------------------------------------------------|
|                              | 307 | Decreased testosterone synthesis leading to short anogenital distance (AGD) in male (mammalian) offspring          | Decreased AGD                       | Fetal; pregnancy                    | Human, mouse, rat              | Male         | Terje Svingen            | Under development: Not open for comment. Do not cite  |
| <b>Reproductive (female)</b> | 167 | Early-life estrogen receptor activity leading to endometrial carcinoma in the mouse                                | Endometrial carcinoma               | Fetal to parturition; Juvenile      | Mouse                          | Female       | Charles Wood             | Under Development: Contributions and Comments Welcome |
|                              | 398 | Inhibition of ALDH1A (RALDH) causing reduced all-trans retinoic acid levels leading to impaired fertility, females | Decreased fertility                 | During development and at adulthood | Human, mouse, rat              | Female       | Terje Svingen            | Under development: Not open for comment. Do not cite  |
| <b>Cardiovascular</b>        | 16  | Acetylcholinesterase inhibition leading to acute mortality                                                         | Increased mortality                 | All life stages                     | NA                             | Unspecific   | Dan Villeneuve           | Under Development: Contributions and Comments Welcome |
|                              | 43  | Disruption of VEGFR Signaling Leading to Developmental Defects                                                     | Developmental defects               | Conception to fetal; Pregnancy      | Human, mouse, rat, zebrafish   | NA           | Tom Knudsen              | Open for citation & comment                           |
|                              | 104 | Altered ion channel activity leading impaired heart function                                                       | Increased mortality                 | All life stages                     | NA                             | Unspecific   | Kevin Dreher             | Under Development: Contributions and Comments Welcome |
|                              | 150 | Aryl hydrocarbon receptor activation leading to early life stage mortality, via reduced VEGF                       | Early Life Stage Mortality          | Embryo                              | Mouse, rat, zebrafish, chicken | Female, male | Amani Farhat             | Open for citation & comment                           |
|                              | 261 | L-type calcium channel blockade leading to heart failure via decrease in cardiac contractility                     | Heart failure                       | All life stages                     | Vertebrates                    | Female, male | Luigi Margiotta-Casaluci | Under development: Not open for comment. Do not cite  |
|                              | 433 | hERG inhibition leading to cardiac toxicity                                                                        | Sudden cardiac death                | All life stages                     | Human                          | Unspecific   | Egemen Bilgin            | Under development: Not open for comment. Do not cite  |
|                              | 436 | Inhibition of RALDH2 causes reduced all-trans retinoic acid levels, leading to transposition of the great arteries | Transposition of the great arteries | Fetal                               | Mouse, vertebrates, chicken    | Mixed        | Gina Mennen              | Open for comment. Do not cite                         |

|                          |     |                                                                                                                                        |                                                  |                                     |                                   |              |                       |                                                       |
|--------------------------|-----|----------------------------------------------------------------------------------------------------------------------------------------|--------------------------------------------------|-------------------------------------|-----------------------------------|--------------|-----------------------|-------------------------------------------------------|
| <b>Liver</b>             | 46  | AFB1: Mutagenic Mode-of-Action leading to Hepatocellular Carcinoma (HCC)                                                               | Hepatocellular carcinoma                         | During development and at adulthood | Human, rat, monkey, dog, chickens | Unspecific   | Ted Simon             | Open for citation & comment                           |
|                          | 107 | Constitutive androstane receptor activation leading to hepatocellular adenomas and carcinomas in the mouse and the rat                 | Hepatocellular adenoma and carcinoma             | All life stages                     | Mouse, rat                        | Female, male | Kristin Lichti-Kaiser | Open for citation & comment                           |
|                          | 209 | Perturbation of cholesterol and glutathione homeostasis leading to hepatotoxicity: Integrated multi-OMICS approach for building AOP    | Hepatotoxicity                                   | All life stages                     | NA                                | Unspecific   | Jinhee Choi           | Under development: Not open for comment. Do not cite  |
|                          | 220 | Cyp2E1 Activation Leading to Liver Cancer                                                                                              | Liver cancer                                     | All life stages                     | Human, rodents                    | Mixed        | Francina Webster      | Open for citation & comment                           |
| <b>Other soft organs</b> | 39  | Covalent Binding of Low Molecular Weight Organic Chemicals to Proteins leads to Sensitisation (Sensitization) of the Respiratory Tract | Allergic Respiratory Hypersensitivity Response   | All life stages                     | Human, mouse                      | Unspecific   | Kristie Sullivan      | Under Development: Contributions and Comments Welcome |
|                          | 206 | Peroxisome proliferator-activated receptors $\gamma$ inactivation leading to lung fibrosis                                             | Lung fibrosis                                    | All life stages                     | Human                             | Unspecific   | Jinhee Choi           | Under development: Not open for comment. Do not cite  |
|                          | 257 | Receptor mediated endocytosis and lysosomal overload leading to kidney toxicity                                                        | Kidney toxicity                                  | All life stages                     | Human, mouse, rat, monkey, dog    | Unspecific   | Angela Mally          | Under development: Not open for comment. Do not cite  |
|                          | 298 | Chronic reactive oxygen species leading to human treatment-resistant gastric cancer                                                    | Treatment-resistant gastric cancer               | All life stages                     | Human                             | Unspecific   | Shihori Tanabe        | Open for comment. Do not cite                         |
|                          | 316 | Trypsin inhibition leading to pancreatic acinar cell tumors                                                                            | Pancreatic acinar cell tumors                    | All life stages                     | Human, mouse, rat, macaca         | Mixed        | Shigeru Hisada        | Under development: Not open for comment. Do not cite  |
| <b>Skeletal</b>          | 94  | Sodium channel inhibition leading to congenital malformations                                                                          | Increased amputations                            | Fetal                               | Human, mouse, rat                 | NA           | Kellie Fay            | Under Development: Contributions and Comments Welcome |
| <b>Immune</b>            | 154 | Inhibition of Calcineurin Activity Leading to Impaired T-Cell Dependent Antibody Response                                              | Impairment of T-cell dependent antibody response | All life stages                     | Human, mouse, rat, macaca         | Unspecific   | Takumi Ohishi         | Open for comment. Do not cite                         |

|                 |     |                                                                                                                           |                                                  |                 |                              |            |                  |                                                       |
|-----------------|-----|---------------------------------------------------------------------------------------------------------------------------|--------------------------------------------------|-----------------|------------------------------|------------|------------------|-------------------------------------------------------|
|                 | 314 | Binding to estrogen receptor (ER)- $\alpha$ in immune cells leading to exacerbation of systemic lupus erythematosus (SLE) | Exacerbation of systemic lupus erythematosus     | All life stages | Human                        | Mixed      | Yasuharu Otsubo  | Under development: Not open for comment. Do not cite  |
|                 | 315 | Inhibition of JAK3 leading to impairment of T-Cell Dependent Antibody Response                                            | Impairment of T-cell dependent antibody response | All life stages | Human, mouse                 | Unspecific | Yasuhiro Yoshida | Under development: Not open for comment. Do not cite  |
| <b>Others</b>   | 202 | Inhibitor binding to topoisomerase II leading to infant leukaemia                                                         | Infant leukemia                                  | Embryo          | Human                        | Unspecific | Andrea Terron    | Open for comment. Do not cite                         |
|                 | 263 | Uncoupling of oxidative phosphorylation leading to growth inhibition via decreased cell proliferation                     | Growth decrease                                  | Embryo          | Human, mouse, rat, zebrafish | Unspecific | You Song         | Open for citation & comment                           |
|                 | 265 | Uncoupling of oxidative phosphorylation leading to growth inhibition via decreased lipid storage                          | Growth decrease                                  | All life stages | NA                           | Unspecific | You Song         | Under development: Not open for comment. Do not cite  |
|                 | 296 | Oxidative DNA damage leading to chromosomal aberrations and mutations                                                     | Chromosomal aberrations increase                 | All life stages | Human, mouse, rat            | Unspecific | Carole Yauk      | Open for comment. Do not cite                         |
| <b>Placenta</b> | 151 | AhR activation leading to preeclampsia                                                                                    | Preeclampsia                                     | Pregnancy       | Human, mouse                 | Female     | Sabrina Tait     | Under development: Not open for comment. Do not cite  |
|                 | 431 | Increased tumor necrosis factor (TNF) leading to increased risk of gestational diabetes mellitus (GDM)                    | Gestational diabetes mellitus                    | Pregnancy       | Human                        | Female     | Qi Wang          | Under Development: Contributions and Comments Welcome |
